# Supplementary material
Source: publisher figshare collection journal article supplement (https://acs.figshare.com/ndownloader/files/20129156)
Supplement: Supplementary file 1 [file 20129156]

**Supporting Information for:**

**Counterion Transport and Transference Number in Aqueous and Nonaqueous Short Chain Polyelectrolyte Solutions**

Kyle M. Diederichsen\*‡; Rickey C. Terrell\*; Bryan D. McCloskey\*‡

\*Department of Chemical and Biomolecular Engineering, University of California, Berkeley, CA, 94720

‡Energy Storage and Distributed Resources Division, Lawrence Berkeley National Laboratory, Berkeley, CA, 94720

*Backbone Diffusion Coefficient Scaling*

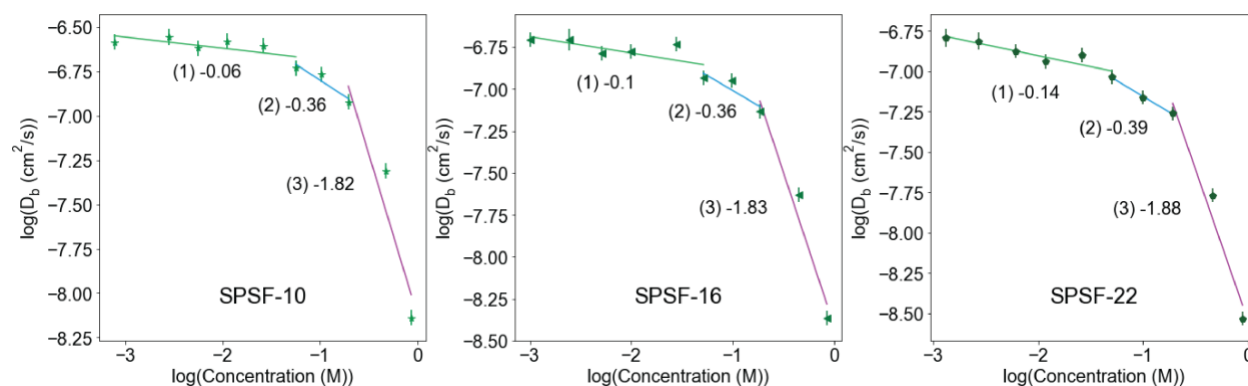

Figure S1. Scaling of backbone diffusion coefficient as a function of concentration in DMSO-d<sub>6</sub> for the three polymers not shown in the main text.

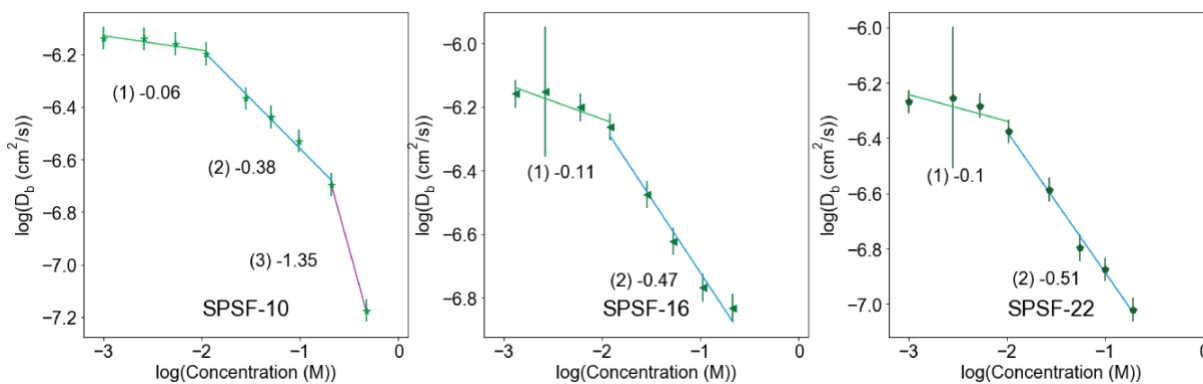

Figure S2. Scaling of backbone diffusion coefficient as a function of concentration in D<sub>2</sub>O for the three polymers not shown in the main text.
